# Supplementary material for: Spectral and thermometric properties altering through crystal field strength modification and host material composition in luminescence thermometers based on Fe3+doped AB2O4type nanocrystals (A = Mg, Ca; B = Al, Ga)
Source: Royal Society of Chemistry journal article supplement (doi:10.1039/d0tc04917d), 2020-11-16
Supplement: d0tc04917d1.pdf [file d0tc04917d1.pdf]

## SUPPORTING INFORMATION

### Spectral and thermometric properties altering through crystal field strength modification in luminescent thermometers based on Fe<sup>3+</sup> doped AB<sub>2</sub>O<sub>4</sub> type nanocrystals (A=Mg, Ca, B=Al, Ga)

K.Kniec<sup>1\*</sup>, W. Piotrowski<sup>1</sup>, K. Ledwa<sup>1</sup>, L. D. Carlos<sup>2</sup>, L. Marciniak<sup>1\*</sup>,

<sup>1</sup>Institute of Low Temperature and Structure Research, Polish Academy of Sciences, Okólna 2, 50-422 Wrocław, Poland

<sup>2</sup> Phantom-g, CICECO-Aveiro Institute of Materials, Department of Physics, University of Aveiro, Campus de Santiago, 3810-193 Aveiro, Portugal

\* corresponding author: [k.kniec@intibs.pl](mailto:k.kniec@intibs.pl), [l.marciniak@intibs.pl](mailto:l.marciniak@intibs.pl)

*KEYWORDS: iron, terbium, luminescence, crystal field, spinel, luminescent nanothermometry*

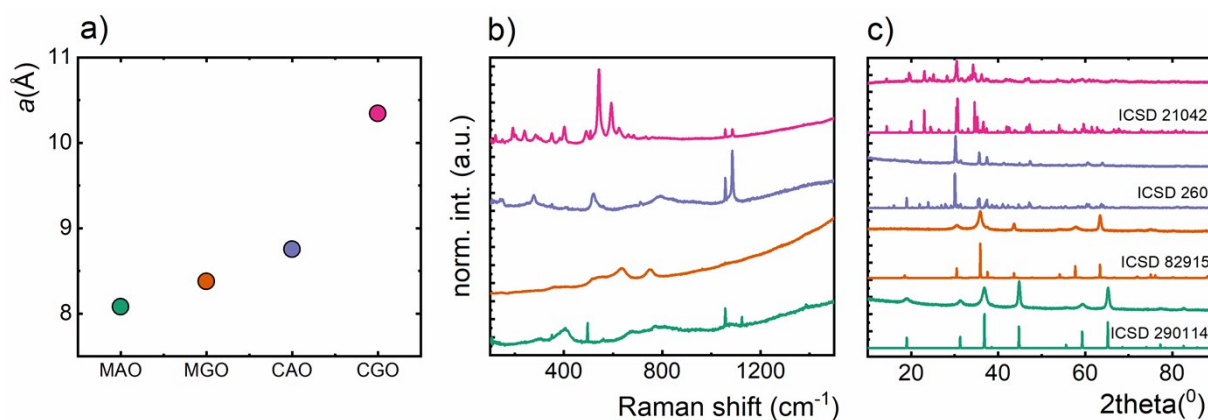

**Figure S1.** Calculated cell parameters for Fe<sup>3+</sup>-doped spinel nanocrystals –a); Raman spectra of MgAl<sub>2</sub>O<sub>4</sub>, MgGa<sub>2</sub>O<sub>4</sub>, CaAl<sub>2</sub>O<sub>4</sub> and CaGa<sub>2</sub>O<sub>4</sub> nanomaterials doped with Fe<sup>3+</sup> ions –b); XRD diffraction patterns of Fe<sup>3+</sup>, Tb<sup>3+</sup> - co-doped spinel nanocrystals –c).

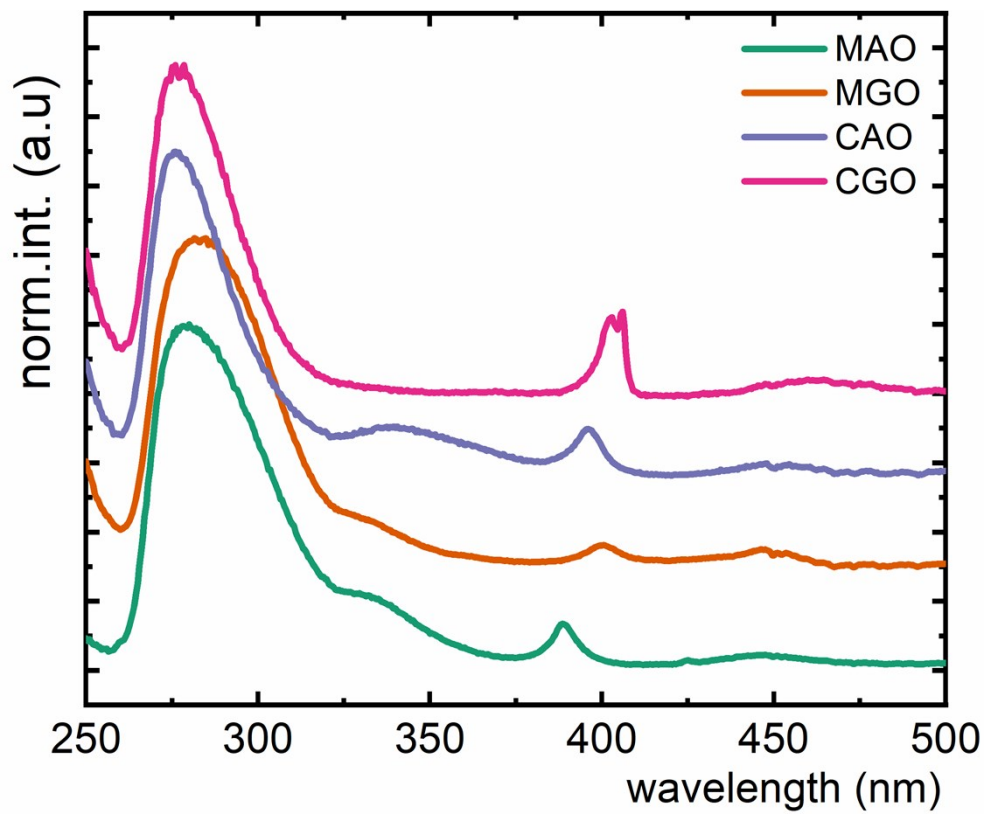

**Figure S2.** The excitation spectra of Fe<sup>3+</sup> -doped spinel nanocrystals recorded at -150°C.

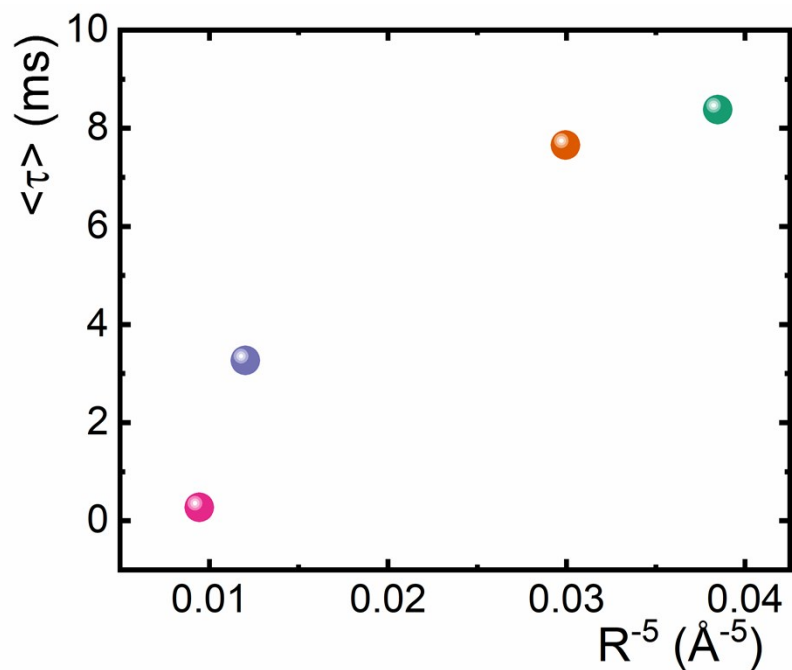

**Figure S3.** The average luminescence lifetime as a function of CFS.

$$\frac{-\Delta E_a}{k} \cdot \frac{1}{T} = \ln\left(\frac{I_o}{I_{em}} - 1\right) \quad (\text{eq. S1})$$

where  $I_o$  represents the initial emission intensity (at  $-150^\circ\text{C}$ ),  $k$  is Boltzmann constant

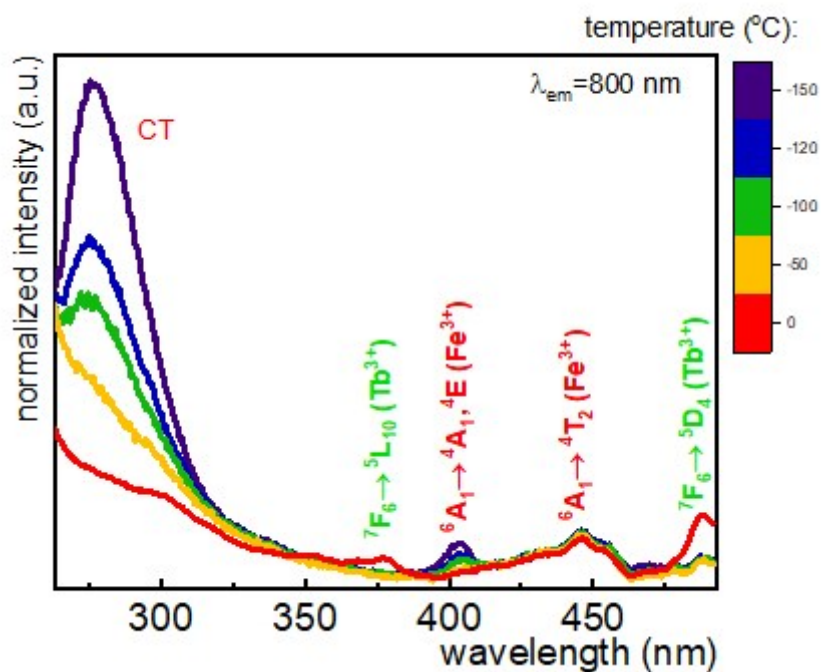

**Figure S4.** Thermal evolution of excitation spectra for representative CGO:Fe<sup>3+</sup>, Tb<sup>3+</sup> nanocrystals measured for Fe<sup>3+</sup> luminescence (for  $\lambda_{em}=800$  nm).

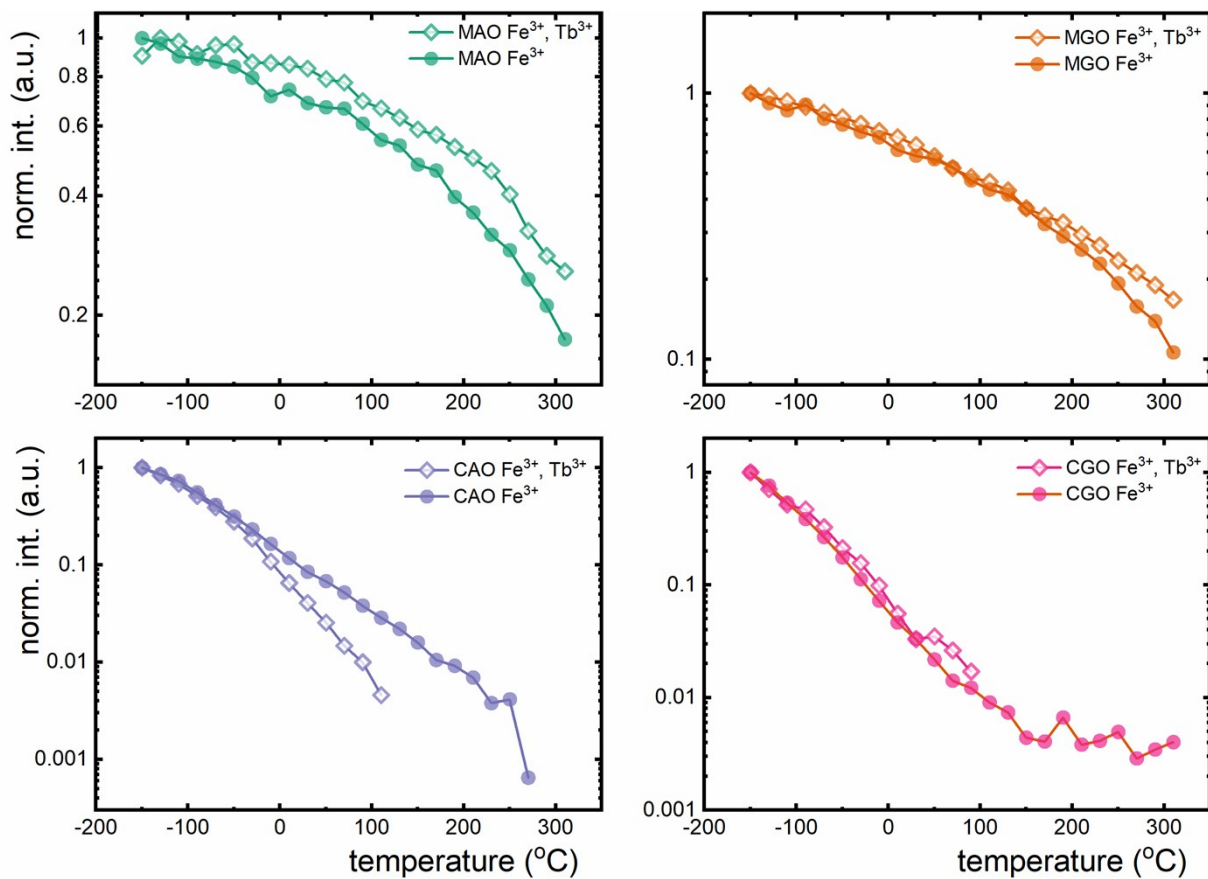

**Figure S5.** The thermally affected emission intensity of Fe<sup>3+</sup> in the single Fe<sup>3+</sup>-doped (circle) and Tb<sup>3+</sup>-co-doped (square) spinel nanocrystals.

$$\delta T = \frac{1}{S_R} \cdot \frac{\Delta}{LIR} \quad (\text{eq. S2})$$

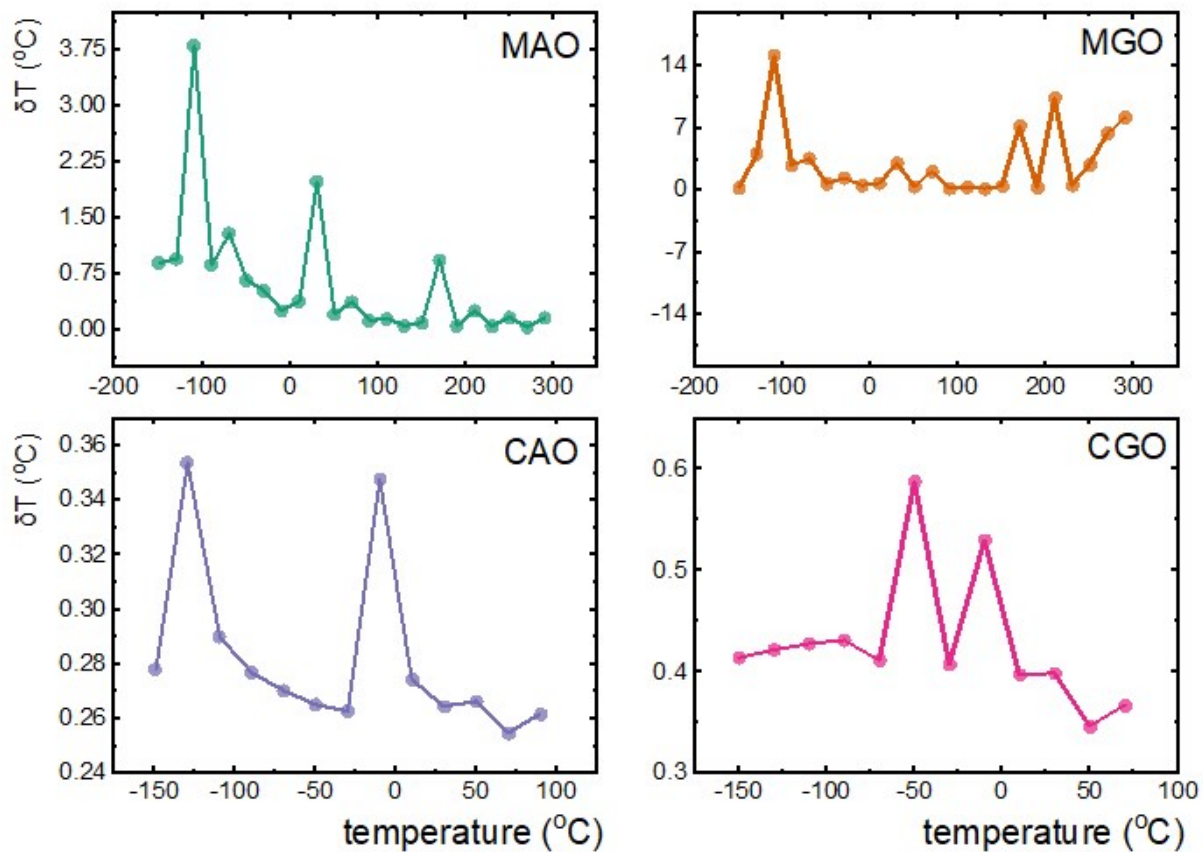

**Figure S6.** The uncertainty of temperature measurement using  $\text{Fe}^{3+}, \text{Tb}^{3+}$ -doped spinel ratiometric luminescence nanothermometers.

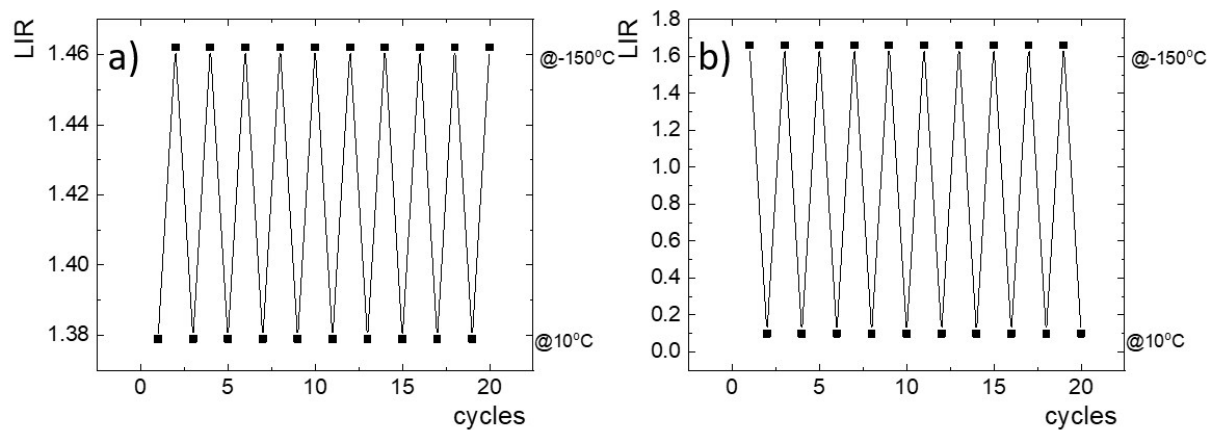

**Figure S7.** LIR values for several heating-cooling cycles for MGO-a) and CGO-b) nanocrystals
